# Supplementary material
Source: MDPI journal article supplement (https://www.mdpi.com/1999-4907/15/4/599)
Supplement: s1 [file s1]

## Supplementary Material

Table S1

| Number | Land use types | Geographical coordinates       | Vegetation types                                                                          | Slope position | Altitude/m | Sand/% | Silt/% | Clay/% |
|--------|----------------|--------------------------------|-------------------------------------------------------------------------------------------|----------------|------------|--------|--------|--------|
| 1      | SF             | 26°51'19.0"N,<br>104°18'21.1"E | Maize ( <i>Zea mays</i> ) and potato ( <i>Solanum tuberosum</i> )                         | Upper slope    | 2295       | 36.26  | 53.43  | 8.55   |
| 2      | SF             | 26°51'21.7"N,<br>104°18'19.7"E | Maize ( <i>Zea mays</i> ) and potato ( <i>Solanum tuberosum</i> )                         | Upper slope    | 2292       | 35.93  | 51.20  | 12.80  |
| 3      | SF             | 26°51'24.5"N,<br>104°18'18.4"E | Maize ( <i>Zea mays</i> ) and potato ( <i>Solanum tuberosum</i> )                         | Upper slope    | 2291       | 28.00  | 59.82  | 10.68  |
| 4      | SF             | 26°51'25.9"N,<br>104°18'15.5"E | Maize ( <i>Zea mays</i> ) and potato ( <i>Solanum tuberosum</i> )                         | Upper slope    | 2294       | 21.17  | 53.40  | 23.50  |
| 5      | SF             | 26°51'28.2"N,<br>104°18'10.7"E | Maize ( <i>Zea mays</i> ) and potato ( <i>Solanum tuberosum</i> )                         | Upper slope    | 2268       | 15.82  | 55.59  | 25.66  |
| 6      | GL             | 26°51'30.4"N,<br>104°18'08.3"E | Ryegrass ( <i>Lolium perenne</i> L.) and alfalfa ( <i>Medicago sativa</i> )               | Upper slope    | 2289       | 13.47  | 49.34  | 36.47  |
| 7      | SF             | 26°51'32.8"N,<br>104°18'03.7"E | Maize ( <i>Zea mays</i> ) and potato ( <i>Solanum tuberosum</i> )                         | Upper slope    | 2300       | 10.00  | 60.13  | 32.21  |
| 8      | SF             | 26°51'31.2"N,<br>104°18'00.6"E | Maize ( <i>Zea mays</i> ) and potato ( <i>Solanum tuberosum</i> )                         | Upper slope    | 2308       | 8.83   | 57.94  | 30.04  |
| 9      | AFL            | 26°51'28.6"N,<br>104°18'00.4"E | Yunnan Pine ( <i>Pinus Yunnanensis</i> ) and Huashan Pine ( <i>Pinus armandii</i> Franch) | Upper slope    | 2287       | 10.32  | 62.54  | 25.88  |
| 10     | SL             | 26°51'16.3"N,<br>104°18'13.1"E | Firethorn ( <i>Pyracantha fortuneana</i> ) and huckleberry ( <i>E. pungens</i> )          | Middle slope   | 2290       | 14.35  | 47.33  | 36.58  |
| 11     | SL             | 26°51'18.8"N,<br>104°18'10.3"E | Firethorn ( <i>Pyracantha fortuneana</i> ) and huckleberry ( <i>E. pungens</i> )          | Middle slope   | 2274       | 6.74   | 66.52  | 25.75  |

|    |     |                                |                                                                                           |              |      |       |       |       |
|----|-----|--------------------------------|-------------------------------------------------------------------------------------------|--------------|------|-------|-------|-------|
| 12 | SF  | 26°51'25.9"N,<br>104°18'02.5"E | Maize ( <i>Zea mays</i> ) and potato ( <i>Solanum tuberosum</i> )                         | Middle slope | 2273 | 23.71 | 62.47 | 12.92 |
| 13 | SF  | 26°51'27.1"N,<br>104°18'00.1"E | Maize ( <i>Zea mays</i> ) and potato ( <i>Solanum tuberosum</i> )                         | Middle slope | 2273 | 14.09 | 70.70 | 15.00 |
| 14 | SF  | 26°51'28.8"N,<br>104°17'58.0"E | Maize ( <i>Zea mays</i> ) and potato ( <i>Solanum tuberosum</i> )                         | Middle slope | 2272 | 11.58 | 49.21 | 38.51 |
| 15 | SF  | 26°51'17.9"N,<br>104°18'04.1"E | Maize ( <i>Zea mays</i> ) and potato ( <i>Solanum tuberosum</i> )                         | Middle slope | 2268 | 7.76  | 51.32 | 40.62 |
| 16 | GL  | 26°51'25.3"N,<br>104°17'55.0"E | Ryegrass ( <i>Lolium perenne</i> L.) and alfalfa ( <i>Medicago sativa</i> )               | Lower slope  | 2258 | 16.70 | 51.08 | 31.92 |
| 17 | GL  | 26°51'13.4"N,<br>104°18'04.6"E | Ryegrass ( <i>Lolium perenne</i> L.) and alfalfa ( <i>Medicago sativa</i> )               | Lower slope  | 2251 | 7.49  | 62.61 | 25.91 |
| 18 | GL  | 26°51'06.5"N,<br>104°18'08.3"E | Ryegrass ( <i>Lolium perenne</i> L.) and alfalfa ( <i>Medicago sativa</i> )               | Lower slope  | 2255 | 11.97 | 58.18 | 25.86 |
| 19 | GL  | 26°51'13.4"N,<br>104°18'20.3"E | Ryegrass ( <i>Lolium perenne</i> L.) and alfalfa ( <i>Medicago sativa</i> )               | Lower slope  | 2258 | 11.88 | 58.24 | 25.88 |
| 20 | SL  | 26°51'10.8"N,<br>104°18'21.4"E | Firethorn ( <i>Pyracantha fortuneana</i> ) and huckleberry ( <i>E. pungens</i> )          | Lower slope  | 2267 | 14.37 | 66.99 | 12.97 |
| 21 | GL  | 26°51'06.8"N,<br>104°18'22.0"E | Ryegrass ( <i>Lolium perenne</i> L.) and alfalfa ( <i>Medicago sativa</i> )               | Lower slope  | 2249 | 20.46 | 58.27 | 17.27 |
| 22 | GL  | 26°51'04.8"N,<br>104°18'19.2"E | Ryegrass ( <i>Lolium perenne</i> L.) and alfalfa ( <i>Medicago sativa</i> )               | Middle slope | 2250 | 18.54 | 58.09 | 19.36 |
| 23 | SL  | 26°51'04.2"N,<br>104°18'15.6"E | Firethorn ( <i>Pyracantha fortuneana</i> ) and huckleberry ( <i>E. pungens</i> )          | Middle slope | 2253 | 22.97 | 49.41 | 23.63 |
| 24 | AFL | 26°51'07.3"N,<br>104°18'17.8"E | Yunnan Pine ( <i>Pinus Yunnanensis</i> ) and Huashan Pine ( <i>Pinus armandii</i> Franch) | Middle slope | 2260 | 26.55 | 56.41 | 13.04 |
| 25 | AFL | 26°51'20.7"N,<br>104°18'04.2"E | Yunnan Pine ( <i>Pinus Yunnanensis</i> ) and Huashan Pine ( <i>Pinus armandii</i> Franch) | Upper slope  | 2269 | 40.08 | 37.88 | 21.04 |
| 26 | SF  | 26°51'11.0"N,<br>104°18'15.5"E | Maize ( <i>Zea mays</i> ) and potato ( <i>Solanum tuberosum</i> )                         | Upper slope  | 2272 | 19.08 | 63.09 | 16.83 |

|    |     |                                |                                                                                           |              |      |       |       |       |
|----|-----|--------------------------------|-------------------------------------------------------------------------------------------|--------------|------|-------|-------|-------|
| 27 | SF  | 26°51'07.9"N,<br>104°18'14.1"E | Maize ( <i>Zea mays</i> ) and potato ( <i>Solanum tuberosum</i> )                         | Middle slope | 2267 | 12.82 | 54.63 | 31.52 |
| 28 | SL  | 26°51'05.8"N,<br>104°18'12.3"E | Firethorn ( <i>Pyracantha fortuneana</i> ) and huckleberry ( <i>E. pungens</i> )          | Middle slope | 2263 | 17.25 | 69.39 | 12.62 |
| 29 | AFL | 26°51'08.2"N,<br>104°18'09.6"E | Yunnan Pine ( <i>Pinus Yunnanensis</i> ) and Huashan Pine ( <i>Pinus armandii</i> Franch) | Upper slope  | 2275 | 15.22 | 58.85 | 24.89 |
| 30 | AFL | 26°51'10.9"N,<br>104°18'11.6"E | Yunnan Pine ( <i>Pinus Yunnanensis</i> ) and Huashan Pine ( <i>Pinus armandii</i> Franch) | Upper slope  | 2280 | 19.84 | 73.49 | 6.30  |
| 31 | AFL | 26°51'18.6"N,<br>104°18'08.4"E | Yunnan Pine ( <i>Pinus Yunnanensis</i> ) and Huashan Pine ( <i>Pinus armandii</i> Franch) | Upper slope  | 2290 | 13.49 | 60.13 | 26.01 |
| 32 | SL  | 26°51'19.7"N,<br>104°18'02.1"E | Firethorn ( <i>Pyracantha fortuneana</i> ) and huckleberry ( <i>E. pungens</i> )          | Middle slope | 2265 | 24.10 | 47.90 | 27.76 |
| 33 | SL  | 26°51'23.0"N,<br>104°17'53.8"E | Firethorn ( <i>Pyracantha fortuneana</i> ) and huckleberry ( <i>E. pungens</i> )          | Middle slope | 2261 | 20.92 | 63.26 | 15.32 |
| 34 | SL  | 26°51'22.1"N,<br>104°17'57.8"E | Firethorn ( <i>Pyracantha fortuneana</i> ) and huckleberry ( <i>E. pungens</i> )          | Middle slope | 2257 | 20.70 | 59.25 | 19.53 |
| 35 | SF  | 26°51'20.1"N,<br>104°17'59.9"E | Maize ( <i>Zea mays</i> ) and potato ( <i>Solanum tuberosum</i> )                         | Lower slope  | 2247 | 25.07 | 52.47 | 21.95 |
| 36 | SF  | 26°51'11.3"N,<br>104°18'05.1"E | Maize ( <i>Zea mays</i> ) and potato ( <i>Solanum tuberosum</i> )                         | Middle slope | 2271 | 19.38 | 63.90 | 16.22 |
| 37 | AFL | 26°51'17.9"N,<br>104°17'55.0"E | Yunnan Pine ( <i>Pinus Yunnanensis</i> ) and Huashan Pine ( <i>Pinus armandii</i> Franch) | Middle slope | 2271 | 33.48 | 58.57 | 7.45  |
| 38 | SF  | 26°51'15.5"N,<br>104°17'57.6"E | Maize ( <i>Zea mays</i> ) and potato ( <i>Solanum tuberosum</i> )                         | Middle slope | 2270 | 36.58 | 52.06 | 9.51  |
| 39 | SL  | 26°51'14.8"N,<br>104°17'58.7"E | Firethorn ( <i>Pyracantha fortuneana</i> ) and huckleberry ( <i>E. pungens</i> )          | Middle slope | 2264 | 33.47 | 53.91 | 11.57 |
| 40 | SL  | 26°51'10.9"N,<br>104°18'01.9"E | Firethorn ( <i>Pyracantha fortuneana</i> ) and huckleberry ( <i>E. pungens</i> )          | Lower slope  | 2252 | 30.15 | 55.37 | 13.29 |
| 41 | GL  | 26°51'08.9"N,<br>104°18'04.2"E | Ryegrass ( <i>Lolium perenne</i> L.) and alfalfa ( <i>Medicago sativa</i> )               | Lower slope  | 2257 | 20.10 | 63.61 | 15.68 |

|    |     |                                |                                                                                               |              |      |       |       |       |
|----|-----|--------------------------------|-----------------------------------------------------------------------------------------------|--------------|------|-------|-------|-------|
| 42 | SL  | 26°51'06.7"N,<br>104°18'05.6"E | Firethorn ( <i>Pyracantha fortuneana</i> ) and<br>huckleberry ( <i>E. pungens</i> )           | Lower slope  | 2262 | 24.63 | 61.79 | 13.19 |
| 43 | SL  | 26°51'28.0"N,<br>104°18'04.1"E | Firethorn ( <i>Pyracantha fortuneana</i> ) and<br>huckleberry ( <i>E. pungens</i> )           | Lower slope  | 2249 | 15.85 | 62.26 | 20.59 |
| 44 | SL  | 26°51'25.5"N,<br>104°18'05.6"E | Firethorn ( <i>Pyracantha fortuneana</i> ) and<br>huckleberry ( <i>E. pungens</i> )           | Lower slope  | 2244 | 17.48 | 67.65 | 14.07 |
| 45 | AFL | 26°51'23.1"N,<br>104°18'08.7"E | Yunnan Pine ( <i>Pinus Yunnanensis</i> ) and<br>Huashan Pine ( <i>Pinus armandii Franch</i> ) | Lower slope  | 2250 | 21.65 | 60.12 | 18.04 |
| 46 | SL  | 26°51'20.8"N,<br>104°18'12.6"E | Firethorn ( <i>Pyracantha fortuneana</i> ) and<br>huckleberry ( <i>E. pungens</i> )           | Middle slope | 2272 | 22.59 | 58.10 | 17.64 |
| 47 | AFL | 26°51'18.8"N,<br>104°18'15.7"E | Yunnan Pine ( <i>Pinus Yunnanensis</i> ) and<br>Huashan Pine ( <i>Pinus armandii Franch</i> ) | Upper slope  | 2266 | 23.96 | 61.06 | 14.72 |
| 48 | SF  | 26°51'15.9"N,<br>104°18'18.1"E | Maize ( <i>Zea mays</i> ) and potato ( <i>Solanum<br/>tuberosum</i> )                         | Lower slope  | 2239 | 24.90 | 61.47 | 13.56 |
| 49 | SF  | 26°51'10.8"N,<br>104°18'17.4"E | Maize ( <i>Zea mays</i> ) and potato ( <i>Solanum<br/>tuberosum</i> )                         | Middle slope | 2240 | 23.62 | 62.73 | 13.46 |
| 50 | AFL | 26°51'12.3"N,<br>104°18'17.3"E | Yunnan Pine ( <i>Pinus Yunnanensis</i> ) and<br>Huashan Pine ( <i>Pinus armandii Franch</i> ) | Upper slope  | 2258 | 24.72 | 62.89 | 11.66 |
| 51 | SF  | 26°51'13.8"N,<br>104°18'14.5"E | Maize ( <i>Zea mays</i> ) and potato ( <i>Solanum<br/>tuberosum</i> )                         | Lower slope  | 2225 | 26.65 | 59.74 | 12.36 |
| 52 | SF  | 26°51'20.6"N,<br>104°18'07.9"E | Maize ( <i>Zea mays</i> ) and potato ( <i>Solanum<br/>tuberosum</i> )                         | Lower slope  | 2227 | 27.46 | 60.75 | 11.42 |
| 53 | SL  | 26°51'23.8"N,<br>104°18'05.1"E | Firethorn ( <i>Pyracantha fortuneana</i> ) and<br>huckleberry ( <i>E. pungens</i> )           | Lower slope  | 2233 | 26.02 | 60.51 | 12.02 |
| 54 | SL  | 26°51'26.8"N,<br>104°17'53.3"E | Firethorn ( <i>Pyracantha fortuneana</i> ) and<br>huckleberry ( <i>E. pungens</i> )           | Middle slope | 2246 | 25.26 | 61.97 | 10.83 |
| 55 | SL  | 26°51'25.3"N,<br>104°17'59.4"E | Firethorn ( <i>Pyracantha fortuneana</i> ) and<br>huckleberry ( <i>E. pungens</i> )           | Upper slope  | 2248 | 21.32 | 67.44 | 10.82 |
| 56 | AFL | 26°51'23.3"N,<br>104°18'02.9"E | Yunnan Pine ( <i>Pinus Yunnanensis</i> ) and<br>Huashan Pine ( <i>Pinus armandii Franch</i> ) | Middle slope | 2230 | 24.53 | 61.10 | 13.71 |

|    |     |                                |                                                                                              |              |      |       |       |       |
|----|-----|--------------------------------|----------------------------------------------------------------------------------------------|--------------|------|-------|-------|-------|
| 57 | SL  | 26°51'13.2"N,<br>104°18'06.9"E | Firethorn ( <i>Pyracantha fortuneana</i> ) and<br>huckleberry ( <i>E. pungens</i> )          | Middle slope | 2232 | 21.32 | 64.56 | 13.62 |
| 58 | GL  | 26°51'16.2"N,<br>104°18'08.7"E | Ryegrass ( <i>Lolium perenne</i> L.) and alfalfa<br>( <i>Medicago sativa</i> )               | Lower slope  | 2213 | 26.72 | 61.43 | 11.55 |
| 59 | GL  | 26°51'15.2"N,<br>104°18'11.1"E | Ryegrass ( <i>Lolium perenne</i> L.) and alfalfa<br>( <i>Medicago sativa</i> )               | Middle slope | 2220 | 10.94 | 62.56 | 26.10 |
| 60 | GL  | 26°51'12.8"N,<br>104°18'14.4"E | Ryegrass ( <i>Lolium perenne</i> L.) and alfalfa<br>( <i>Medicago sativa</i> )               | Middle slope | 2227 | 9.87  | 61.21 | 28.42 |
| 61 | SL  | 26°51'15.3"N,<br>104°18'06.3"E | Firethorn ( <i>Pyracantha fortuneana</i> ) and<br>huckleberry ( <i>E. pungens</i> )          | Middle slope | 2217 | 10.17 | 65.95 | 23.08 |
| 62 | SF  | 26°51'23.2"N,<br>104°17'57.9"E | Maize ( <i>Zea mays</i> ) and potato ( <i>Solanum<br/>tuberosum</i> )                        | Middle slope | 2214 | 14.97 | 61.00 | 23.13 |
| 63 | SF  | 26°51'16.5"N,<br>104°18'01.6"E | Maize ( <i>Zea mays</i> ) and potato ( <i>Solanum<br/>tuberosum</i> )                        | Lower slope  | 2210 | 17.68 | 49.86 | 31.46 |
| 64 | GL  | 26°51'11.5"N,<br>104°18'08.3"E | Ryegrass ( <i>Lolium perenne</i> L.) and alfalfa<br>( <i>Medicago sativa</i> )               | Lower slope  | 2212 | 12.07 | 50.92 | 35.59 |
| 65 | GL  | 26°51'08.6"N,<br>104°18'06.9"E | Ryegrass ( <i>Lolium perenne</i> L.) and alfalfa<br>( <i>Medicago sativa</i> )               | Lower slope  | 2216 | 9.70  | 56.05 | 32.44 |
| 66 | GL  | 26°51'12.7"N,<br>104°18'01.7"E | Ryegrass ( <i>Lolium perenne</i> L.) and alfalfa<br>( <i>Medicago sativa</i> )               | Lower slope  | 2215 | 29.58 | 54.70 | 13.91 |
| 67 | GL  | 26°51'15.6"N,<br>104°17'59.5"E | Ryegrass ( <i>Lolium perenne</i> L.) and alfalfa<br>( <i>Medicago sativa</i> )               | Lower slope  | 2211 | 23.57 | 60.84 | 13.99 |
| 68 | SL  | 26°51'18.7"N,<br>104°17'58.6"E | Firethorn ( <i>Pyracantha fortuneana</i> ) and<br>huckleberry ( <i>E. pungens</i> )          | Lower slope  | 2210 | 25.02 | 56.31 | 17.17 |
| 69 | AFL | 26°51'19.5"N,<br>104°17'56.8"E | Yunnan Pine ( <i>Pinus Yunnanensis</i> ) and<br>Huashan Pine ( <i>Pinus armandii</i> Franch) | Middle slope | 2229 | 6.94  | 64.03 | 27.48 |
| 70 | AFL | 26°51'04.1"N,<br>104°18'09.0"E | Yunnan Pine ( <i>Pinus Yunnanensis</i> ) and<br>Huashan Pine ( <i>Pinus armandii</i> Franch) | Upper slope  | 2242 | 4.70  | 62.60 | 31.32 |

Note: AFL, artificial forest land; SL, shrubland; SF, sloping farmland; GL, grassland.
